# Supplementary material for: Novel CuBr-assisted graphdiyne synthesis strategy and application for efficient photocatalytic hydrogen evolution
Source: Royal Society of Chemistry journal article supplement (doi:10.1039/d1tc04932a), 2022-01-01
Supplement: d1tc04932a1.pdf [file d1tc04932a1.pdf]

## Supporting Information

### Novel CuBr-assisted graphdiyne synthesis strategy and application for efficient photocatalytic hydrogen evolution

Junke Li, Mei Li, Hongying Li, Zhiliang Jin\*

*1.School of Chemistry and Chemical Engineering, Ningxia Key Laboratory of Solar Chemical Conversion  
Technology, Key Laboratory for Chemical Engineering and Technology, State Ethnic Affairs Commission, North  
Minzu University, Yinchuan 750021, P.R.China*

Corresponding Author: [zl-jin@nmu.edu.cn](mailto:zl-jin@nmu.edu.cn) (Z.L Jin)

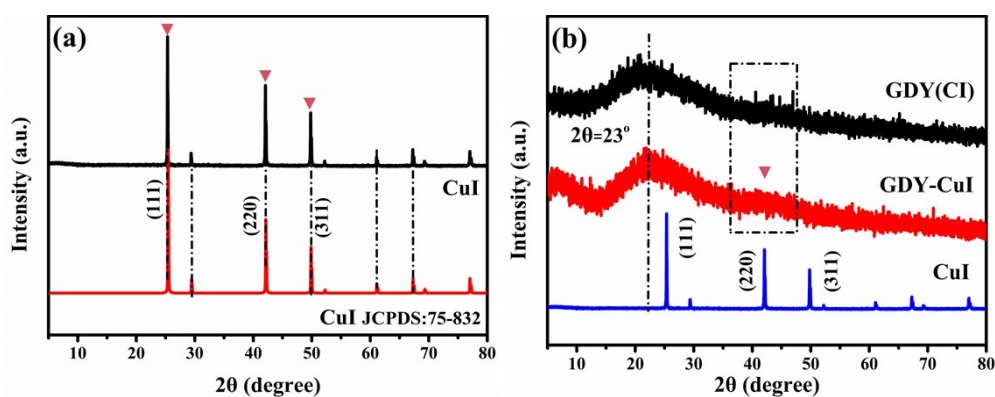

Fig.S1 XRD pattern of (a) CuI, (b)GDY(CI), GDY-CuI, and CuI.

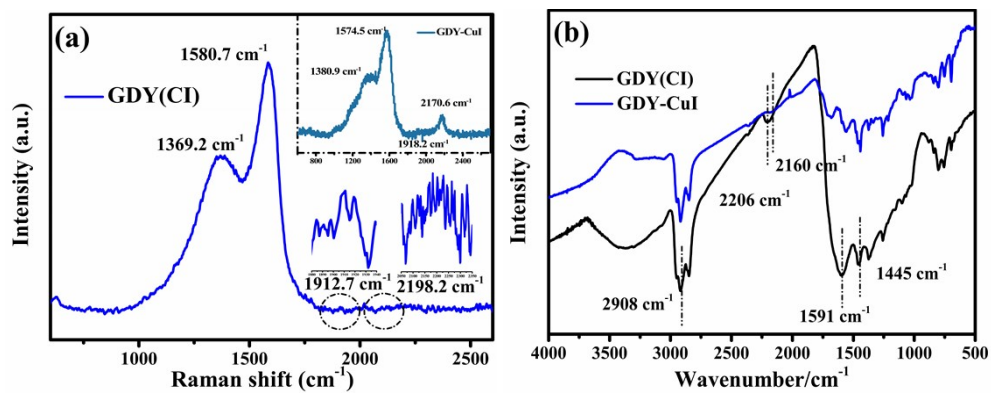

Fig.S2 Raman pattern of (a) GDY(CI), the insert picture is GDY-CuI, (b)FT-IR spectra of GDY(CI) and GDY-CuI.

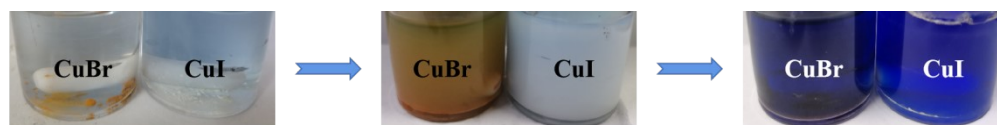

After adding sacrificial reagent

Ultrasonic treatment

After light irradiation for 5h

**Fig.S3** Color change of CuBr and CuI in the photocatalytic hydrogen evolution process.

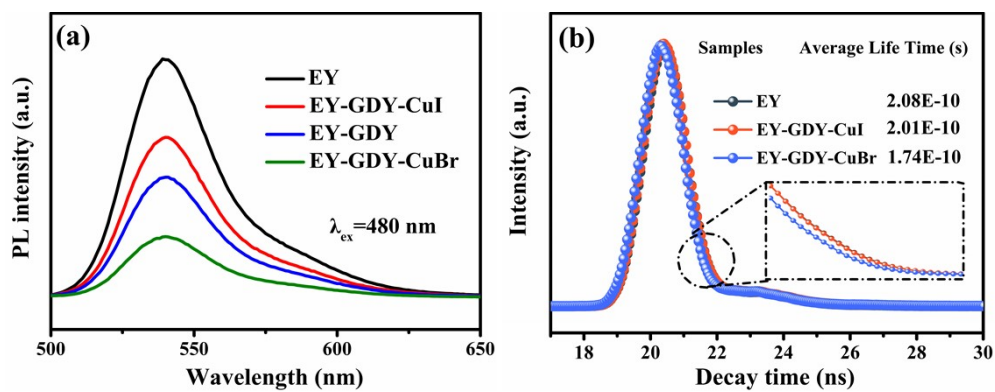

**Fig.S4** (a) Photoluminescence spectroscopy of EY, GDY, GDY-CuI, and GDY-CuBr, (b) time-resolved photoluminescence spectra of EY, GDY-CuI, and GDY-CuBr.

**Table S1** Exponential curve fitting parameters of emission decay for the samples.

| Samples  | $\tau_1$ [ns]               | $\tau_2$ [ns]                | $\chi^2$ | $\tau_{av}$ [ns] |
|----------|-----------------------------|------------------------------|----------|------------------|
| EY       | 0.21(B <sub>1</sub> =100%)  | ---                          | 0.85     | 0.21             |
| GDY-CuI  | 4.52(B <sub>1</sub> =0.54%) | 0.20(B <sub>2</sub> =99.46%) | 0.89     | 0.20             |
| GDY-CuBr | 3.87(B <sub>1</sub> =0.94%) | 0.17(B <sub>2</sub> =99.06%) | 1.01     | 0.17             |

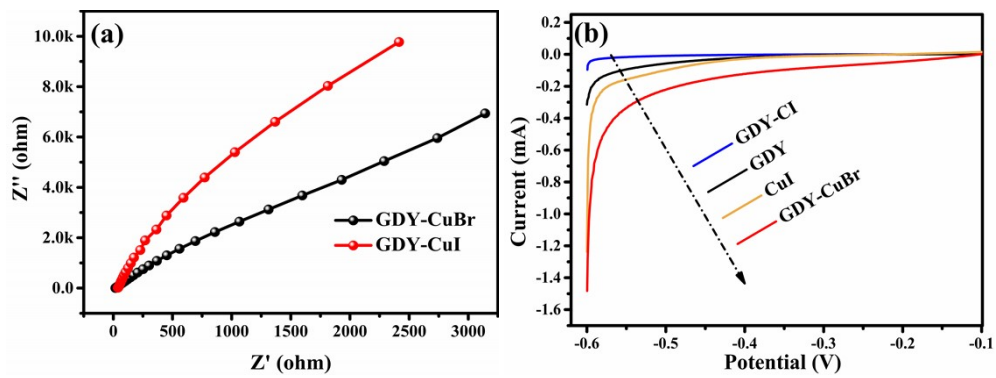

**Fig.S5** (a) Electrochemical impedance spectroscopy of GDY, and GDY-CuI, (b) Linear sweep voltammograms of GDY, CuI, GDY-CuI, and GDY-CuBr.
